# Supplementary material for: Learn the Past and Present to Teach the Future—Role of Active Surveillance of Exposure to Endemic and Emerging Viruses in the Approach of European Bison Health Protection
Source: MDPI journal article supplement (doi:10.3390/d15040535), 2023-04-07
Supplement: s1 [file s1]

**Table S1.** The size of European bison populations included in the study by year.

| Origin                   | population type | 2015 | 2016 | 2017 | 2018 | 2019 | 2020 | 2021 | increase 2015-2021 (individuals) | % increase 2015-2021 | mean % increase/year |
|--------------------------|-----------------|------|------|------|------|------|------|------|----------------------------------|----------------------|----------------------|
| Białowieża Forest        | free-ranging    | 578  | 596  | 654  | 519  | 770  | 715  | 779  | 201                              | 34.8                 | 5.1                  |
| Borecka Forest           | free-ranging    | 107  | 108  | 120  | 112  | 112  | 117  | 125  | 18                               | 16.8                 | 2.6                  |
| Knyszyńska Forest        | free-ranging    | 134  | 144  | 158  | 158  | 184  | 214  | 212  | 78                               | 58.2                 | 7.9                  |
| Bieszczady               | free-ranging    | 344  | 402  | 487  | 551  | 668  | 707  | 729  | 385                              | 111.9                | 13.3                 |
| Zachodniopomorskie herds | free-ranging    | 184  | 205  | 216  | 265  | 305  | 334  | 340  | 156                              | 84.8                 | 10.8                 |
| Augustowska Forest       | free-ranging    | 0    | 0    | 0    | 8    | 9    | 17   | 20   | 12                               | 150.0                | 35.7                 |
| Pszczyna (Jankowice)     | captive         | 43   | 50   | 42   | 48   | 56   | 45   | 50   | 7                                | 16.3                 | 2.5                  |
| Białowieża reserves      | captive         | 28   | 39   | 43   | 19   | 27   | 31   | 28   | 0                                | 0.0                  | 0.0                  |
| Niepołomice              | captive         | 27   | 26   | 27   | 23   | 22   | 19   | 16   | -11                              | -40.7                | -8.4                 |
| Muczne (Bieszczady)      | captive         | 12   | 16   | 11   | 11   | 9    | 13   | 10   | -2                               | -16.7                | -3.0                 |
| Jabłonowo                | captive         | 6    | 9    | 8    | 9    | 10   | 7    | 9    | 3                                | 50.0                 | 7.0                  |
| ZOO Warszawa             | captive         | 6    | 5    | 7    | 6    | 8    | 7    | 9    | 3                                | 50.0                 | 7.0                  |
| Międzyzdroje             | captive         | 7    | 8    | 9    | 9    | 6    | 8    | 8    | 1                                | 14.3                 | 2.3                  |
| Bałtów                   | captive         | 8    | 9    | 8    | 8    | 8    | 6    | 7    | -1                               | -12.5                | -2.2                 |
| Gołuchów                 | captive         | 11   | 12   | 10   | 7    | 5    | 6    | 7    | -4                               | -36.4                | -7.3                 |
| ZOO Gdańsk               | captive         | 10   | 12   | 13   | 12   | 13   | 5    | 7    | -3                               | -30.0                | -5.8                 |
| Zoo Poznań               | captive         | 2    | 2    | 3    | 5    | 5    | 6    | 7    | 5                                | 250.0                | 23.2                 |
| Pszczyna Park            | captive         | 8    | 7    | 7    | 6    | 7    | 5    | 6    | -2                               | -25.0                | -4.7                 |
| ZOO Bydgoszcz            | captive         | 3    | 3    | 3    | 4    | 4    | 3    | 4    | 1                                | 33.3                 | 4.9                  |
| Szewce                   | captive         | 0    | 0    | 0    | 0    | 0    | 5    | 3    | 3                                | n.a                  | n.a                  |
| Ustroń                   | captive         | 4    | 4    | 5    | 3    | 3    | 3    | 2    | -2                               | -50.0                | -10.9                |
| Kiermusy                 | captive         | 6    | 7    | 8    | 8    | 6    | 4    | 0    | -6                               | n.a                  | n.a.                 |
| Smardzewice              | captive         | 7    | 6    | 6    | 0    | 0    | 0    | 0    | -7                               | n.a                  | n.a.                 |
| ZOO Łódź                 | captive         | 3    | 1    | 0    | 0    | 0    | 0    | 0    | -3                               | n.a                  | n.a.                 |
|                          | total           | 1538 | 1671 | 1845 | 1791 | 2237 | 2277 | 2378 | 832                              | 54.1                 | 7.5                  |
|                          | free-ranging    | 1347 | 1455 | 1635 | 1613 | 2048 | 2104 | 2205 | 858                              | 63.7                 | 8.6                  |
|                          | captive         | 191  | 216  | 210  | 178  | 189  | 173  | 173  | -18                              | -9.4                 | -1.6                 |

\*not applicable

**Figure S1.** The size of Polish European bison free living populations by year.

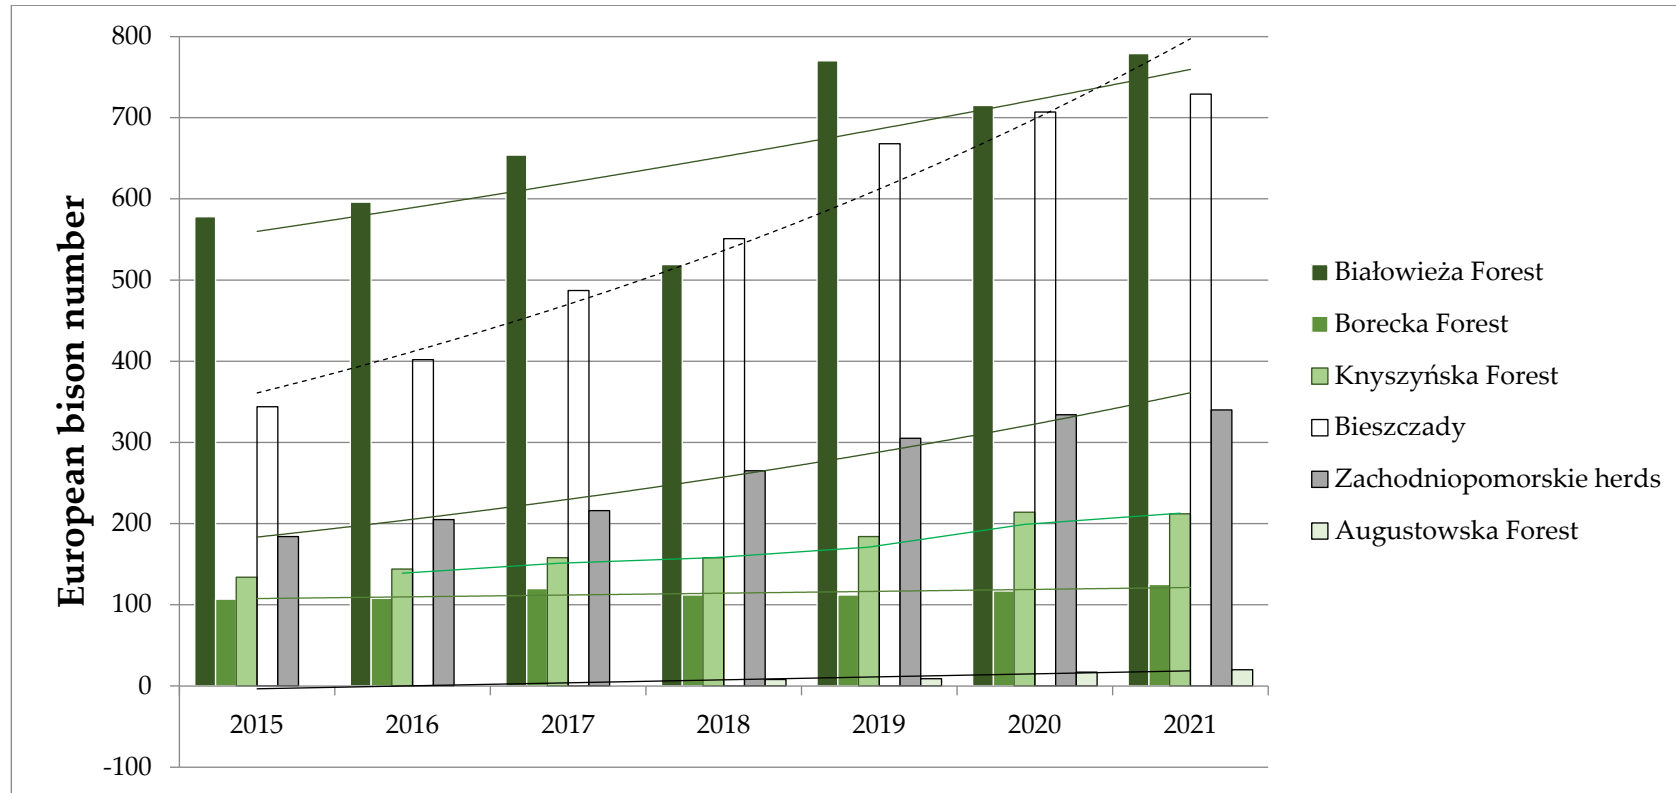

**Figure S2.** The size of Polish European bison captive populations by year.

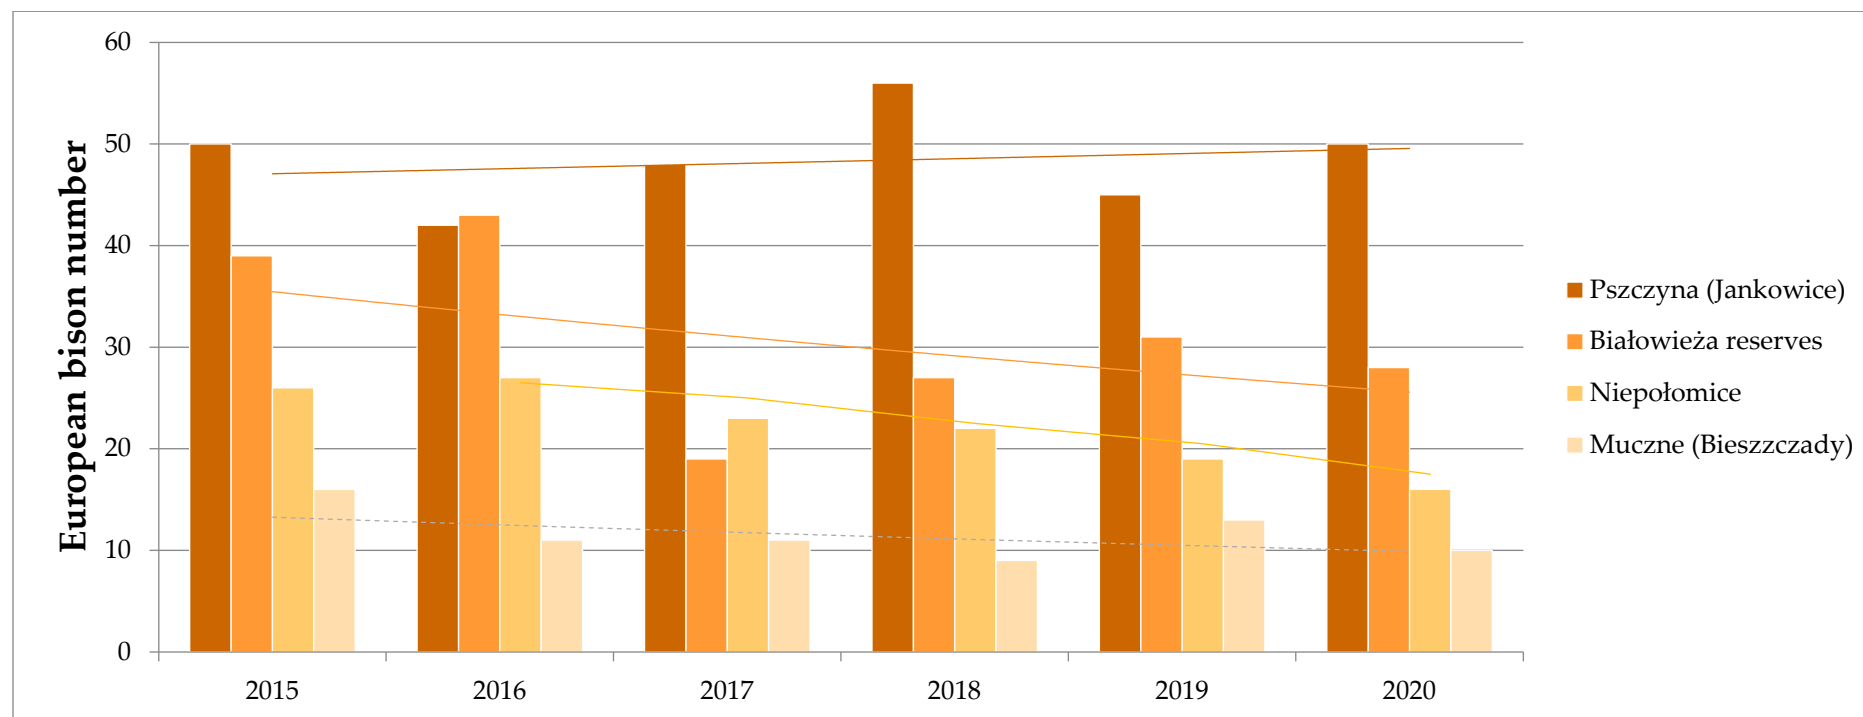

**Table S2.** List of ELISAs used in the serosurveillance of European bison exposure to bovine viral diarrhea virus (BVDV), bovine herpesvirus type 1 (BoHV-1), bovine rhinovirus 3 (BRV3), bovine adenovirus (BAdV-3), bovine respiratory syncytial virus (BRSV), bluetongue virus (BTV) and Schmallenberg virus (SBV).

| Virus  | Kit                                                                                     | Cut-off                                    | Sensitivity  | Specificity  | Reference                |
|--------|-----------------------------------------------------------------------------------------|--------------------------------------------|--------------|--------------|--------------------------|
| BVDV   | Indirect IDEXX BVDV Ab Test (IDEXX Laboratories, Inc., Liebefeld-Bern, Switzerland)     | S/P $\geq$ 0.3                             | 96.3%        | 95.0%        | manufacturer             |
| BoHV-1 | IBR gB X3 Antibody Test kit and (IDEXX Laboratories, Inc., Liebefeld-Bern, Switzerland) | S/N $\geq$ 55%                             | 99.8%        | 100%         | manufacturer             |
| BoHV-4 | Monoscreen AbELISA BoHV-4 (Bio-X Diagnostics S.A., Rochefort, Belgium)                  | S/P>30%                                    |              |              |                          |
| BRV3   | Trivalent Antibody Test kit (IDEXX Montpellier SAS, Montpellier, France)***             | S/P $\geq$ 20%*                            | 98.8%        | 86.7%        | manufacturer             |
| BAdV-3 |                                                                                         |                                            | 75.0%        | 100%         |                          |
| BRSV   |                                                                                         |                                            | not provided | not provided |                          |
| BTV    | Ingezim BTV DR (Ingenaza, Madrid, Spain)                                                | 0.15 $\times\bar{x}$ O.D. positive control | 98.5%        | 99.5%        | [Niedbalski, 2011]       |
| SBV    | ID Screen ELISA Schmallenberg virus Competition Multi-species (ID.vet, Grabels, France) | S/N $\leq$ 40%                             | 100%         | 97.6%        | [Pejaković et al., 2018] |

\*The results was also graduated accordingly to S/P values between weak positive (+) to very strong positive (+++++)

Niedbalski, W. Evaluation of commercial ELISA kits for the detection of antibodies against bluetongue virus. *Pol J Vet Sci.* 2011, 14, 615-619. <https://doi.org/10.2478/v10181-011-0091-y>

Pejaković, S.; Wiggers, L.; Coupeau, D.; Kirschvink, N.; Mason, J.; Muylkens, B. Test selection for antibody detection according to the seroprevalence level of Schmallenberg virus in sheep. *PLoS One* **2018**, 13, e0196532. <https://doi.org/10.1371/journal.pone.0196532>

**Table S3.** Primers and probes used for bovine adenovirus (BAdVs) and bovine rhinovirus 3 (BRV3)

| Target | Primer/probe       | Sequence (5'-3')              | Amplicon size (bp) | Gene/protein | Reference                 |
|--------|--------------------|-------------------------------|--------------------|--------------|---------------------------|
| BAdV   | BAdV-Hex-33F       | GAAATGCGAGGTATCTGTCT          | hexon protein gene | 105          | [Hakhverdyan et al. 2016] |
|        | BAdV-Hex-138R      | TGWTGGAGCTACAAAAGGATCTCTAA    |                    |              |                           |
|        | BAdV-HEX-65-TagMan | TGCAGTTCATCACTGCCACWCAAAGC    |                    |              |                           |
| BRV3   | BPI3F              | TGTCTTCCACTAGATAGAGGGATAAAATT | protein M gene     | 69           | [Horwood et al. 2010]     |
|        | BPI3R              | GCAATGATAACAATGCCATGGA        |                    |              |                           |
|        | BPI3P-FAM-TAMRA    | ACAGCAATTGGATCAATAA           |                    |              |                           |

Hakhverdyan, M. Development of a TaqMan RealTime PCR Assay for the Rapid Detection of Bovine Adenovirus Serotypes in Cattle. J Vet Med Res. 2016, 3,7.

Horwood, P. F.; Mahony, T. J. Multiplex real-time RT-PCR detection of three viruses associated with the bovine respiratory disease complex. J Virol Meth. 2011, 17, 360-363.  
<https://doi.org/10.1016/j.jviromet.2010.11.020>.

**Table S4.** Frequency and antibody levels in the sera of European bison in relation to bovine rhinovirus 3 (BRV3), bovine adenovirus type 3 (BAdV3) and bovine respiratory syncytial virus (BRSV) exposure.

|                              | BRV3 |      | BAdV-3 |      | BRSV |       |
|------------------------------|------|------|--------|------|------|-------|
|                              | n    | %    | n      | %    | n    | %     |
| (weak positive) +            | 27   | 7.1  | 72     | 19.1 | 28   | 7.41  |
| ++                           | 51   | 13.5 | 61     | 16.1 | 13   | 3.44  |
| +++                          | 58   | 15.3 | 39     | 10.3 | 11   | 2.91  |
| ++++                         | 20   | 5.3  | 22     | 5.8  | 4    | 1.06  |
| (very strong positive) +++++ | 8    | 2.1  | 31     | 8.2  | 4    | 1.06  |
| negative                     | 214  | 56.6 | 153    | 40.5 | 318  | 84.13 |
| total                        | 378  | 100  | 378    | 100  | 378  | 100   |
